# Supplementary material
Source: HighWire-hosted journal article supplement (https://bmjpaedsopen.bmj.com/content/3/1/e000516)
Supplement: inline-supplementary-material-1 [file inline-supplementary-material-1.pdf]

## Supporting Information BMJ

A. Baauw, MD <sup>1,2,3,4</sup>

J. Kist-van Holthe, MD, [j.kist@vumc.nl](mailto:j.kist@vumc.nl)

B. Slattery, MSc, [bridget.slattery01@gmail.com](mailto:bridget.slattery01@gmail.com)

M.W. Heymans <sup>5</sup>, [mw.heymans@vumc.nl](mailto:mw.heymans@vumc.nl)

Professor M. Chinapaw, PhD <sup>2</sup>, [m.chinapaw@vumc.nl](mailto:m.chinapaw@vumc.nl)

Professor J.B. van Goudoever, MD <sup>1</sup>, [h.vangoudoever@amc.nl](mailto:h.vangoudoever@amc.nl)

<sup>1</sup> Amsterdam UMC, University of Amsterdam, Vrije Universiteit, Emma Children's Hospital, Amsterdam, The Netherlands

<sup>2</sup> Amsterdam UMC, Vrije Universiteit Amsterdam, Department of Public and Occupational Health, Amsterdam Public Health research institute, Amsterdam, The Netherlands

<sup>3</sup> Department of Pediatrics, University Medical Center Utrecht, Wilhelmina Children's Hospital, The Netherlands

<sup>4</sup> Department of Pediatrics, Rijnstate Hospital, Arnhem, The Netherlands

<sup>5</sup> Amsterdam UMC, Department of Epidemiology and Biostatistics, Location VU University Medical Center, Amsterdam, The Netherlands

**Corresponding author:** A.Baauw, MD, Department of Pediatrics, Wilhelmina Children's Hospital, Lundlaan 6, 3584 EA Utrecht, The Netherlands, +31 0887555555, + 31 6 28 26 55 51, Email: [a.baauw@amc.uva.nl](mailto:a.baauw@amc.uva.nl); [A.Baauw@umcutrecht.nl](mailto:A.Baauw@umcutrecht.nl)

**Table S1. Checklist of methodological quality, adapted from *The Dutch Cochrane Centre. Amsterdam: Amsterdam Medical Centre; 2013.***  
**[www.cochrane.nl](http://www.cochrane.nl)**

|                                                                                                                                                                                                                                                                       |       |
|-----------------------------------------------------------------------------------------------------------------------------------------------------------------------------------------------------------------------------------------------------------------------|-------|
| <b>Study type</b><br>1. Which type of study is conducted?                                                                                                                                                                                                             | +/-/? |
| <b>Study population</b><br>2. Was the study population clearly defined?                                                                                                                                                                                               | +/-/? |
| <b>Sample size</b><br>3. What was the sample size?<br><i>Positive if studies included 50 or more children in both the patient group and the control group.</i>                                                                                                        | +/-/? |
| <b>Selection bias</b><br>4. Was selection bias sufficiently accounted for?<br><i>Positive if in- and exclusion criteria were described and did not lead to selection bias</i>                                                                                         | +/-/? |
| <b>Exposure</b><br>5. Was the exposure clearly defined and was the method appropriate?<br><i>Positive if was explained which exposures were measured and by what method (e.g. type of bloodtest)</i>                                                                  | +/-/? |
| <b>Outcome</b><br>6. Was the outcome clearly defined and was the method appropriate?<br><i>Positive if was described which cut-offs were used for the tests to be able to conclude whether there is disease (ie anemia, for serologicals tests, TST cut offs etc)</i> | +/-/? |
| <b>Confounders</b><br>7. Are the most important confounders identified and is this adequately accounted for in the design and analyses?<br><i>Positive if confounders were considered</i>                                                                             | +/-/? |

**Table S2. Quality assessment selected articles**

| No | Author, Year      | Study type* | Study Population | Sample size** | Selection bias | Exposure | Outcome | Confounders | Score |          |
|----|-------------------|-------------|------------------|---------------|----------------|----------|---------|-------------|-------|----------|
| 1  | Aldridge, 2016    | p           | +                | +             | 18,729         | +        | +       | +           | +     | <b>S</b> |
| 2  | Aldridge, 2016    | P           | +                | +             | 15,468         | +        | +       | +           | +     | <b>S</b> |
| 3  | Aucoin, 2013      | CS          | +                | +             | 756            | +        | +       | +           | +     | <b>S</b> |
| 4  | Belhassen, 2017   | Pros        | +                | +             | 373            | +        | +       | +           | -     | <b>M</b> |
| 5  | Belhassen, 2017   | Pros        | +                | +             | 373            | +        | +       | +           | +     | <b>S</b> |
| 6  | Bennet, 2014      | P           | +                | +             | 546            | +        | +       | +           | +     | <b>S</b> |
| 7  | Bennett, 2017     | RS          | +                | +             | 2,422          | +        | +       | +           | +     | <b>S</b> |
| 8  | Botcher, 2015     | CS          | +                | +             | 629            | +        | +       | +           | +     | <b>S</b> |
| 9  | Brodine, 2009     | CS          | +                | +             | 63             | +        | +       | +           | +     | <b>S</b> |
| 10 | Cherian, 2010     | CS          | +                | +             | 163            | -        | +       | -           | +     | <b>W</b> |
| 11 | Dawson-Hahn, 2016 | CS          | +                | +             | 512            | +        | +       | +           | +     | <b>S</b> |
| 12 | Dawson-Hahn, 2010 | CS          | +                | +             | 163            | -        | +       | +           | +     | <b>M</b> |
| 13 | Dawson-Hahn, 2016 | CS          | +                | +             | 982            | +        | +       | +           | +     | <b>S</b> |
| 14 | Denburg, 2007     | RS          | -                | -             | 36             | +        | +       | +           | +     | <b>M</b> |
| 15 | DeVetten, 2017    | RS          | +                | +             | 359            | +        | +       | +           | -     | <b>M</b> |
| 16 | Gray, 2012        | CS          | +                | +             | 328            | -        | +       | +           | +     | <b>M</b> |
| 17 | Heudorf, 2016     | CS          | +                | +             | 1,230          | +        | +       | +           | +     | <b>S</b> |
| 18 | Heudorf, 2016     | CS          | +                | +             | 119            | +        | +       | +           | +     | <b>S</b> |
| 19 | Kotey, 2018       | CS          | +                | +             | 1,950          | +        | +       | +           | -     | <b>M</b> |
| 20 | Liu, 2009         | CS          | +                | +             | 117,752        | +        | +       | +           | +     | <b>S</b> |

|    |                   |      |   |   |        |   |   |   |   |          |
|----|-------------------|------|---|---|--------|---|---|---|---|----------|
| 21 | Lucas, 2010       | Pros | + | + | 524    | + | + | + | + | <b>S</b> |
| 22 | Marquardt, 2016   | CS   | + | - | 102    | + | + | + | + | <b>S</b> |
| 23 | Mitchell, 2018    | P    | + | + | 848    | - | + | + | - | <b>W</b> |
| 24 | Mockenhaupt, 2016 | CS   | + | + | 488    | + | + | - | + | <b>M</b> |
| 25 | Ngo, 2018         | CS   | + | + | 1,154  | + | + | + | + | <b>S</b> |
| 26 | Pace-Asciak, 2013 | RS   | + | + | 277    | + | + | + | + | <b>S</b> |
| 27 | Paxton, 2012      | RS   | + | + | 503    | + | + | + | + | <b>S</b> |
| 28 | Penrose, 2012     | CS   | + | + | 1,157  | + | + | + | + | <b>S</b> |
| 29 | Plotinsky, 2008   | RS   | + | + | 93     | + | + | + | + | <b>S</b> |
| 30 | Proue, 2010       | RS   | + | + | 1,256  | + | + | + | + | <b>S</b> |
| 31 | Ramos, 2010       | RS   | + | + | 1,876  | + | + | + | + | <b>S</b> |
| 32 | Rungan, 2013      | RS   | + | + | 343    | + | + | + | + | <b>S</b> |
| 33 | Salehi, 2015      | RS   | + | + | 210    | + | + | + | + | <b>S</b> |
| 34 | Scott, 2015       | RS   | + | + | 2,514  | + | + | + | + | <b>S</b> |
| 35 | Shah, 2014        | RS   | + | + | 555    | + | + | + | + | <b>S</b> |
| 36 | Sheikh, 2011      | RS   | + | + | 213    | - | + | + | + | <b>S</b> |
| 37 | Stauffer, 2011    | RS   | + | + | 1,685  | + | + | + | + | <b>S</b> |
| 38 | Stellinga, 2007   | RS   | + | + | 122    | + | + | - | - | <b>W</b> |
| 39 | Stellinga, 2007   | LS   | + | + | 135    | + | + | - | - | <b>W</b> |
| 40 | Taylor, 2016      | RS   | + | + | 13,395 | + | + | + | + | <b>S</b> |
| 41 | Theuring, 2016    | CS   | + | + | 1,248  | + | + | + | + | <b>S</b> |
| 42 | Trauer, 2011      | RS   | + | + | 236    | + | + | + | + | <b>S</b> |
| 43 | Ugwu, 2007        | RS   | + | + | 4,214  | + | + | + | + | <b>S</b> |
| 44 | Varkey, 2007      | RS   | + | + | 5,057  | + | + | + | + | <b>S</b> |
| 45 | Varkey, 2007      | RS   | + | + | 4,699  | + | + | + | + | <b>S</b> |

|    |               |    |   |   |       |   |   |   |   |          |
|----|---------------|----|---|---|-------|---|---|---|---|----------|
| 46 | Walker, 2011  | RS | + | + | 27    | - | + | + | - | <b>M</b> |
| 47 | Walters, 2016 | RS | + | + | 407   | - | + | - | + | <b>W</b> |
| 48 | Wishart, 2007 | RS | + | + | 420   | + | + | + | + | <b>S</b> |
| 49 | Yanni, 2013   | RS | + | + | 5,734 | + | + | + | + | <b>S</b> |
| 50 | Yun, 2016     | RS | + | + | 2,291 | + | + | + | + | <b>S</b> |
| 51 | Yun, 2016     | RS | + | + | 8,148 | + | + | + | + | <b>S</b> |
| 52 | Zabel, 2017   | RS | + | + | 150   | + | + | + | + | <b>S</b> |
| 53 | Zwi, 2018     | CS | + | + | 376   | + | + | + | + | <b>S</b> |

\* study type: RS = retrospective ; LC = longitudinal cohort study, CS = cross-sectional study, Pros = Prospective study

**Explanation score:** S = strong; no weak ratings (-/?), M = moderate; one weak rating, W = weak; two or more weak ratings

#### Search strategy

We conducted a systematic search of the bibliographic databases PubMed, EMBASE, and Web of Science on February 14 2017. The terms included were (1) refugee or migrant or

immigrant, (2) medical or health, and (3) screening. The related controlled terms e.g. MeSH, Emtree, or topics, were included in the search. On March 23 2017 an additional search was performed using the controlled term 'unaccompanied minor' in all three databases. I searched for [refugee or migrant or immigrant (mesh or emtree)] AND [health or medical] AND [screening]. I used the limits age 0-18 and human. Pubmed: 1313. Embase: 474. WoS: 1695. After removing duplicates I was left with 3013 unique articles.
